# Supplementary material for: Al-Based coordination polymer nanotubes: simple preparation, post-modification and application in Fe3+ ions sensing
Source: Royal Society of Chemistry journal article supplement (doi:10.1039/c6dt04884f), 2017-01-01
Supplement: c6dt04884f1.pdf [file c6dt04884f1.pdf]

Supporting Information

## Al-based coordination polymer nanotubes: Simple preparation, post-modification and application in Fe<sup>3+</sup> ions sensing

Xiaoyao Dao and Yonghong Ni\*

College of Chemistry and Materials Science, Key Laboratory of Functional Molecular Solids, Ministry of Education, Anhui Laboratory of Molecule-Based Materials, Anhui Key Laboratory of Functional Molecular Solids, Anhui Normal University. 1 Beijing Eastern Road, Wuhu, 241000, PR China. Fax: +86-553-3869303. E-mail: [niyh@mail.ahnu.edu.cn](mailto:niyh@mail.ahnu.edu.cn)

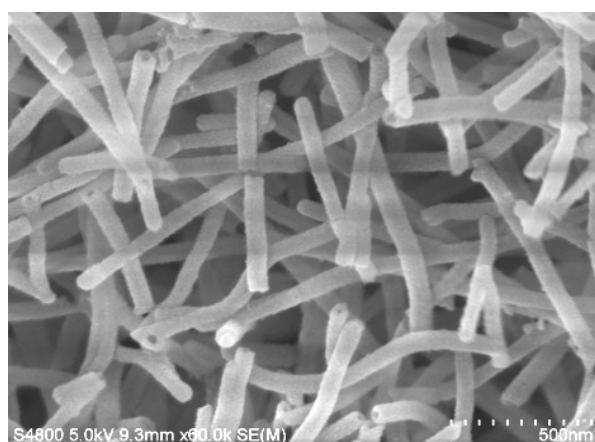

Figure S1. SEM image of MIL-110(Al) nanotubes before activation.

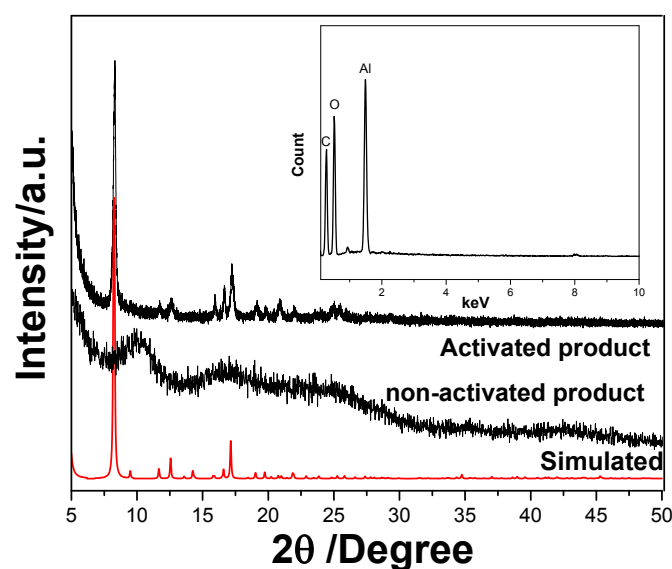

Figure S2. XRD patterns of MIL-110(Al) nanotubes before and after activation, and simulated MIL-110(Al). The inset is the EDS analysis of MIL-110(Al) nanotubes.

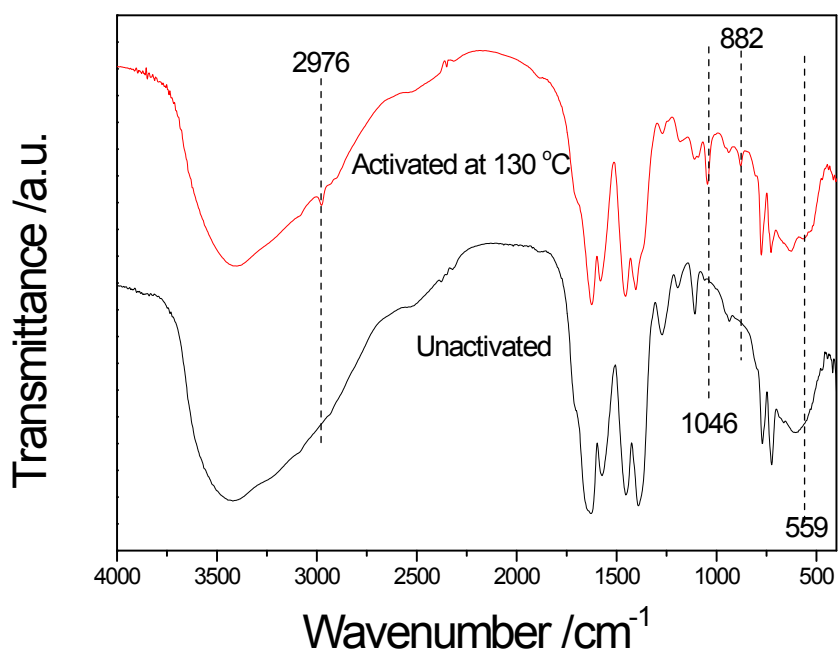

**Figure S3.** FT-IR spectra of the products before and after activating at 130 °C.

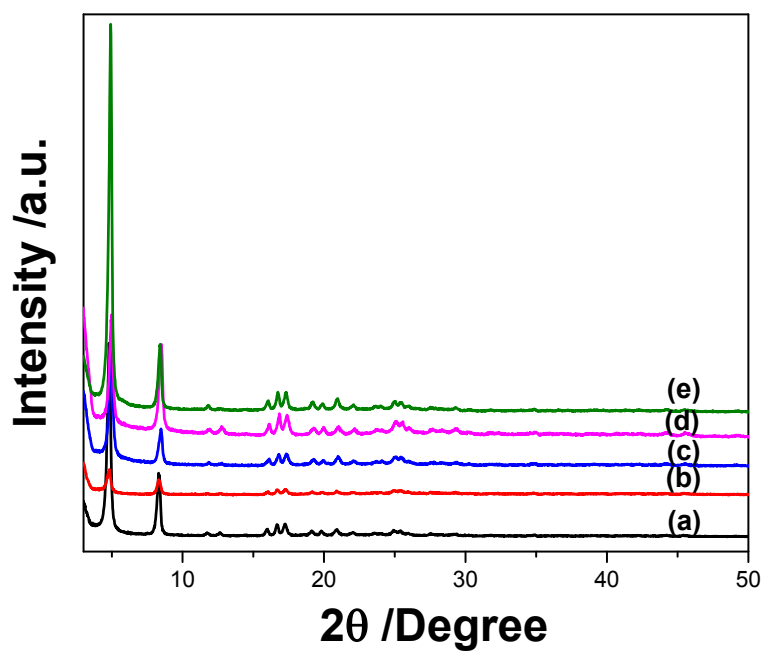

**Figure S4.** XRD patterns of the products obtained from various solvents: (a) pure methanol, (b) pure ethanol, (c) DMF-ethanol with the volume ratio of 10/10, (d) isopropanol-ethanol with the

volume ratio of 10/10 and (e) water-ethanol with the volume ratio of 10/10.

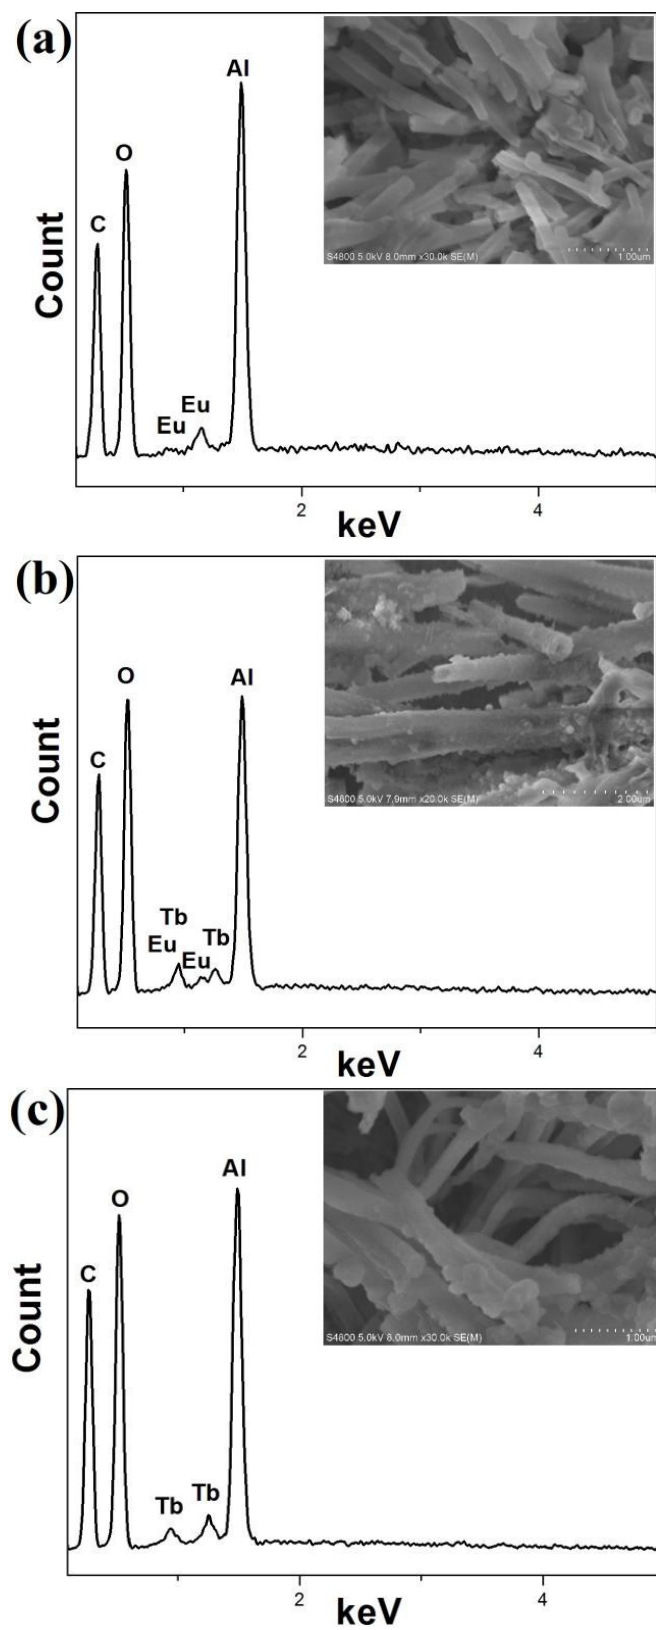

**Figure S5.** EDS analyses of MIL-110(AI)/Ln<sup>3+</sup> and corresponding SEM images: (a) MIL-110(AI)/Eu<sup>3+</sup>, (b) MIL-110(AI)/Eu<sup>3+</sup>, Tb<sup>3+</sup> and (c) MIL-110(AI)/Tb<sup>3+</sup>.

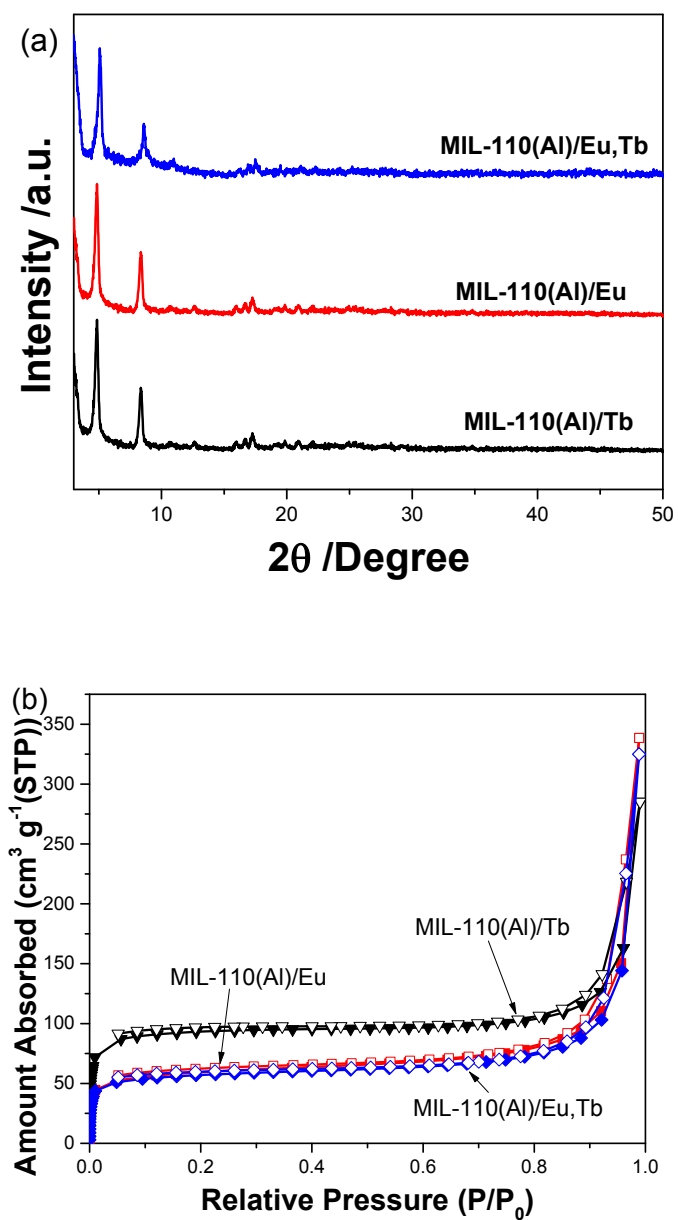

**Figure S6.** (a) XRD patterns and (b) N<sub>2</sub> adsorption-desorption isotherms (at 77 K) of the MIL-110(Al)/Ln<sup>3+</sup> (Ln = Eu, Tb and Eu/Tb).

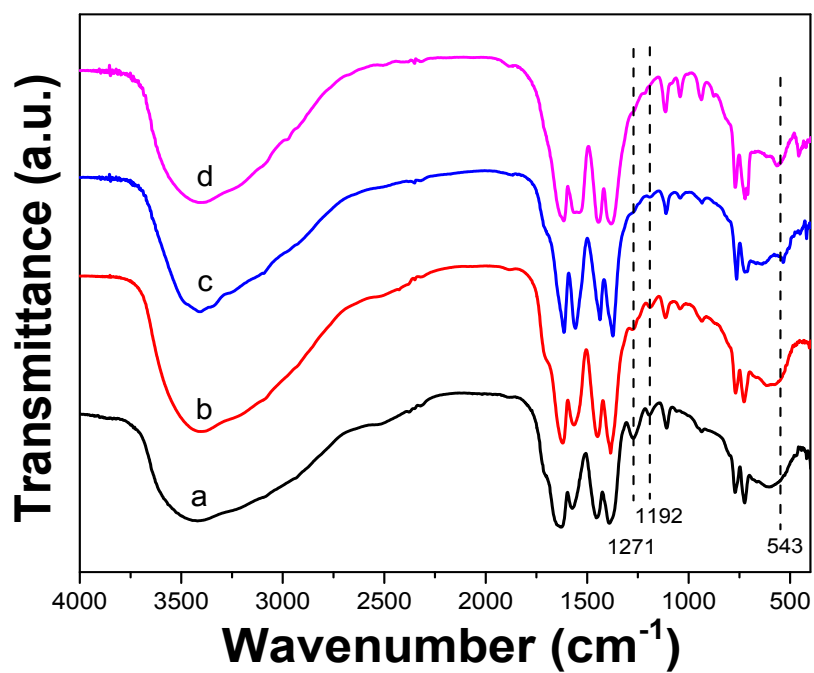

**Figure S7.** The FT-IR spectra of various products: (a) MIL-110(Al), (b) MIL-110(Al)/Eu<sup>3+</sup>, (c) MIL-110(Al)/Tb<sup>3+</sup>, and (d) MIL-110(Al)/Eu<sup>3+</sup>,Tb<sup>3+</sup>.

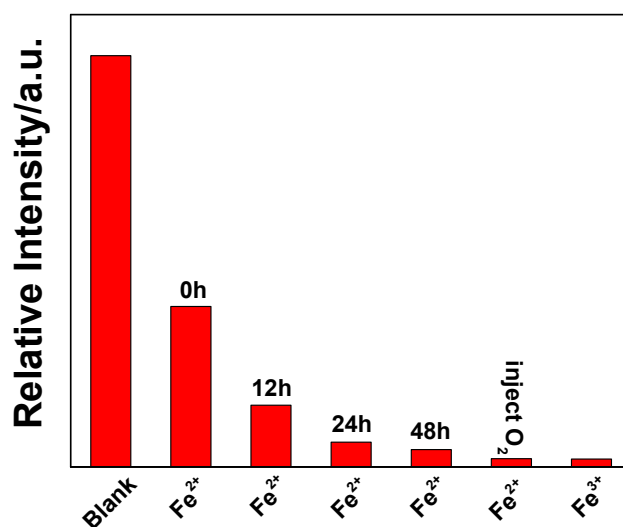

**Figure S8.** Luminescence intensity histograms of MIL-110(Al)/Tb<sup>3+</sup> nanotubes dispersed into aqueous solutions of  $2.0 \times 10^{-2} \text{ mol} \cdot \text{L}^{-1} \text{ Fe}^{2+}$  ions for various durations.

As shown in **Fig.S8**, under the same experimental conditions Fe<sup>2+</sup> ions cannot fully quench the luminescence of MIL-110(Al)/Tb<sup>3+</sup> nanotubes. With the prolonging of the time from 0 to 48 h, the luminescent intensity further reduces, but it is still higher than that after introducing Fe<sup>3+</sup> ions. We believe that the decrease of the PL intensity should be ascribed to the increase of Fe<sup>3+</sup> concentration in the solution due to the gradual oxidation of Fe<sup>2+</sup> ions in air. Therefore, pure O<sub>2</sub> was injected the solution of Fe<sup>2+</sup> ions after having been placed for 48 h. The result showed that the luminescence of MIL-110(Al)/Tb was quenched immediately. The above fact clearly shows that Fe<sup>2+</sup> ions do not disturb the detection of Fe<sup>3+</sup> ions in the current work.

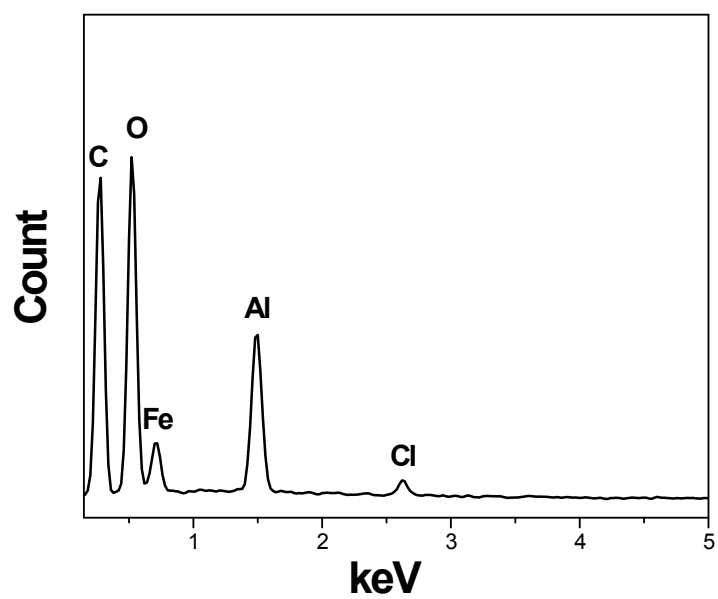

**Figure S9.** EDS analysis of the sample after the luminescent quenching by  $\text{Fe}^{3+}$  ions

**Table S1.** The contents of various metal ions in MIL-110(Al)/Ln<sup>3+</sup> (Ln = Tb<sup>3+</sup>, Eu<sup>3+</sup>, Eu<sup>3+</sup>/Tb<sup>3+</sup>) analyzed by the ICP technology.

| Sample                                         | Al(ppm) | Tb(ppm) | Eu(ppm) | Al/Ln molar ratio |
|------------------------------------------------|---------|---------|---------|-------------------|
| MIL-110(Al)/Tb <sup>3+</sup>                   | 40.84   | 17.79   | /       | 13.5/1            |
| MIL-110(Al)/Eu <sup>3+</sup>                   | 41.73   | /       | 6.75    | 34.8/1            |
| MIL-110(Al)/Eu <sup>3+</sup> ,Tb <sup>3+</sup> | 39.83   | 5.08    | 3.51    | 63.9/1.4/1        |

**Table S2.** The contents of various metal ions in MIL-110(Al) samples after exposure to target metal ions (K<sup>+</sup> or Fe<sup>3+</sup>) obtained by the ICP technology

| Sample                                         | Al(ppm) | Tb(ppm) | M <sup>n+</sup> (ppm) | Al:Tb:M <sup>n+</sup> molar ratio |
|------------------------------------------------|---------|---------|-----------------------|-----------------------------------|
| MIL-110(Al)/Tb <sup>3+</sup> /K <sup>+</sup>   | 41.22   | 17.79   | 4.93                  | 13.51:1:1.125                     |
| MIL-110(Al)/Tb <sup>3+</sup> /Fe <sup>3+</sup> | 34.58   | 0.18    | 22.50                 | 1131:1:361                        |
